# Supplementary material for: Catalytic influence of 16-s-16 gemini surfactants on the rate constant of histidine and ninhydrin
Source: R Soc Open Sci. 2020 Feb 5;7(2):191648. doi: 10.1098/rsos.191648 (PMC7062088; doi:10.1098/rsos.191648)
Supplement: Influence of pH and [His] on rate constant in graphical form. Absorbance vs. wavelength data, effect of [nin] on rate constant, and ratio data of rate constant in Tabular form [file rsos191648supp1.docx]

**Electronic Supplementary Material**

**Catalytic influence of 16-*s*-16 gemini surfactants on rate constant of histidine and ninhydrin**

**Dileep Kumar1,2 and Malik Abdul Rub3**

1Division of Computational Physics, Institute for Computational Science, Ton Duc Thang University, Ho Chi Minh City, Vietnam

2Faculty of Applied Sciences, Ton Duc Thang University, Ho Chi Minh City, Vietnam

3Chemistry Department, Faculty of Science, King Abdulaziz University, Jeddah-21589, Saudi Arabia

**Authors for correspondence:**

Dileep Kumar

email: dileepkumar@tdtu.edu.vn

**Figure S1.** Rate constant (*k*ψ) vs. pH on study of histidine and ninhydrin in surfactants: (A) 16-6-16, (B) 16-5-16, (C) 16-4-16. Reaction conditions: [His]= 1 x 10-4 mol dm-3, [ninhydrin] = 6.0 x 10-3 mol dm-3, [16-*s*-16] = 30 x 10-5 mol dm-3 and temp. = 343 K.

**Figure S2.** Rate constant (*k*ψ) vs. [His] on study of histidine and ninhydrin in surfactants: (A) 16-6-16, (B) 16-5-16, (C) 16-4-16. Reaction conditions: [ninhydrin] = 6.0 x 10-3 mol dm-3, [16-*s*-16] = 30 x 10-5 mol dm-3, temp. = 343 K and pH.

**Table S1.** Data ofabsorbance vs. wavelength (*λ*) on the study of histidine (1 x 10-4 mol dm-3) and ninhydrin (6.0 x 10-3 mol dm-3) in pure water and 16-*s*-16 (*s* = 4, 5, 6) surfactants (30 x 10-5 mol dm-3)at temperature (343 K) and pH (5.0).

| *λ* (nm) | Absorbance | | | |
| --- | --- | --- | --- | --- |
|  | Aqueous | 16-6-16 | 16-5-16 | 16-4-16 |
| 350 | 0.182 | 0.234 | 0.307 | 0.396 |
| 360 | 0.243 | 0.33 | 0.411 | 0.505 |
| 370 | 0.31 | 0.412 | 0.432 | 0.59 |
| 380 | 0.362 | 0.465 | 0.59 | 0.703 |
| 390 | 0.381 | 0.483 | 0.613 | 0.726 |
| 400 | 0.4 | 0.505 | 0.635 | 0.758 |
| 410 | 0.371 | 0.47 | 0.61 | 0.734 |
| 420 | 0.31 | 0.413 | 0.582 | 0.71 |
| 430 | 0.211 | 0.355 | 0.524 | 0.694 |
| 440 | 0.147 | 0.268 | 0.469 | 0.66 |
| 450 | 0.102 | 0.189 | 0.385 | 0.623 |
| 460 | 0.082 | 0.121 | 0.29 | 0.535 |
| 470 | 0.071 | 0.11 | 0.223 | 0.44 |
| 480 | 0.063 | 0.1 | 0.207 | 0.354 |
| 490 | 0.05 | 0.111 | 0.192 | 0.32 |
| 500 | 0.062 | 0.123 | 0.2 | 0.311 |
| 510 | 0.081 | 0.132 | 0.224 | 0.331 |
| 520 | 0.1 | 0.176 | 0.28 | 0.4 |
| 530 | 0.132 | 0.231 | 0.355 | 0.476 |
| 540 | 0.185 | 0.308 | 0.457 | 0.569 |
| 550 | 0.222 | 0.354 | 0.48 | 0.63 |
| 560 | 0.274 | 0.4 | 0.525 | 0.674 |
| 570 | 0.305 | 0.429 | 0.557 | 0.701 |
| 580 | 0.286 | 0.39 | 0.53 | 0.67 |
| 590 | 0.26 | 0.372 | 0.51 | 0.652 |
| 600 | 0.233 | 0.352 | 0.492 | 0.625 |
| 610 | 0.205 | 0.33 | 0.476 | 0.6 |
| 620 | 0.178 | 0.314 | 0.464 | 0.582 |
| 630 | 0.152 | 0.297 | 0.454 | 0.577 |
| 640 | 0.135 | 0.284 | 0.446 | 0.563 |
| 650 | 0.122 | 0.27 | 0.439 | 0.555 |

**Table S2.** Influence of ninhydrin concentration on rate constant (*k*Ψ)on the study on histidine and ninhydrin in 16-*s*-16 gemini surfactants (30 x 10-5 mol dm-3) at constant [His], temp. and pH.

| 103 [Nin]  (mol dm-3) | 104*k*ψ (s-1)  16-6-16 16-5-16 16-4-16 | | |
| --- | --- | --- | --- |
| 0 | 0 | 0 | 0 |
| 6.0 | 5.5 | 6.5 | 7.7 |
| 10.0 | 9.0 | 10.2 | 11.5 |
| 15.0 | 10.4 | 11.7 | 13.2 |
| 20.0 | 11.6 | 12.4 | 13.8 |
| 25.0 | 12.2 | 13.3 | 14.4 |
| 30.0 | 12.6 | 14 | 14.9 |
| 35.0 | 12.9 | 14.5 | 15.4 |
| 40.0 | 13.1 | 14.8 | 15.6 |

**Table S3.** Data ofDetermination of ratio (**)** on the study of histidine (1.0 x 10-4 mol dm-3)and ninhydrin (6.0 x 10-3 mol dm-3) at temperature (343 K) and pH (5.0).

| 105 [gemini]  (mol dm-3) | 16-6-16 | | | 16-5-16 | | | 16-4-16 | | |
| --- | --- | --- | --- | --- | --- | --- | --- | --- | --- |
|  | 104 *k*ψ  (s-1) | 104 *k*ψcal  (s-1) |  | 104 *k*ψ  (s-1) | 104 *k*ψcal  (s-1) |  | 104 *k*ψ  (s-1) | 104*k*ψcal  (s-1) |  |
| 10.0 | 3.4 | 3.5 | -0.02941 | 4.2 | 4.3 | -0.02381 | 5.4 | 5.2 | 0.037037 |
| 20.0 | 4.7 | 4.6 | 0.021277 | 5.4 | 5.6 | -0.03704 | 6.8 | 6.5 | 0.044118 |
| 30.0 | 5.5 | 5.5 | 0 | 6.5 | 6.4 | 0.015385 | 7.7 | 8.0 | -0.03896 |
| 40.0 | 5.7 | 5.9 | -0.03509 | 6.7 | 6.5 | 0.029851 | 7.9 | 7.9 | 0 |
| 50.0 | 5.8 | 6.0 | -0.03448 | 6.8 | 6.6 | 0.029412 | 8.0 | 8.0 | 0 |
| 60.0 | 6.0 | 5.8 | 0.033333 | 6.9 | 7.1 | -0.02899 | 8.2 | 8.4 | -0.02439 |
| 80.0 | 6.2 | 6.3 | -0.01613 | 7.1 | 7.2 | -0.01408 | 8.3 | 8.7 | -0.04819 |
| 100.0 | 6.3 | 6.1 | 0.031746 | 7.2 | 7.2 | 0 | 8.5 | 8.3 | 0.023529 |
| 250.0 | 6.5 | 6.5 | 0 | 7.5 | 7.5 | 0 | 8.8 | 9.0 | -0.02273 |
| 400.0 | 6.8 | 7.0 | -0.02941 | 7.7 | 7.5 | 0.025974 | 9.2 | 9.2 | 0 |
| 600.0 | 7.2 | 7.1 | 0.013889 | 8.2 | 8.0 | 0.02439 | 10.0 | 9.8 | 0.02 |
